# Supplementary material
Source: PubMed Central journal article supplement (PMC5551896)

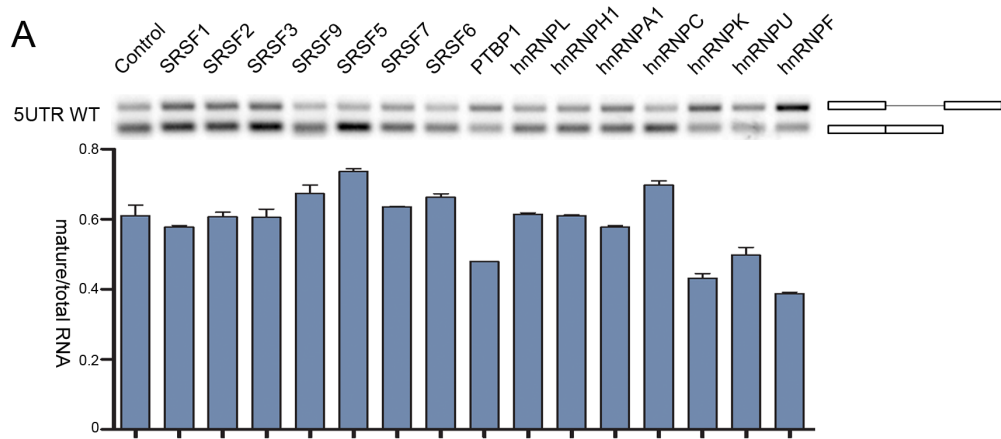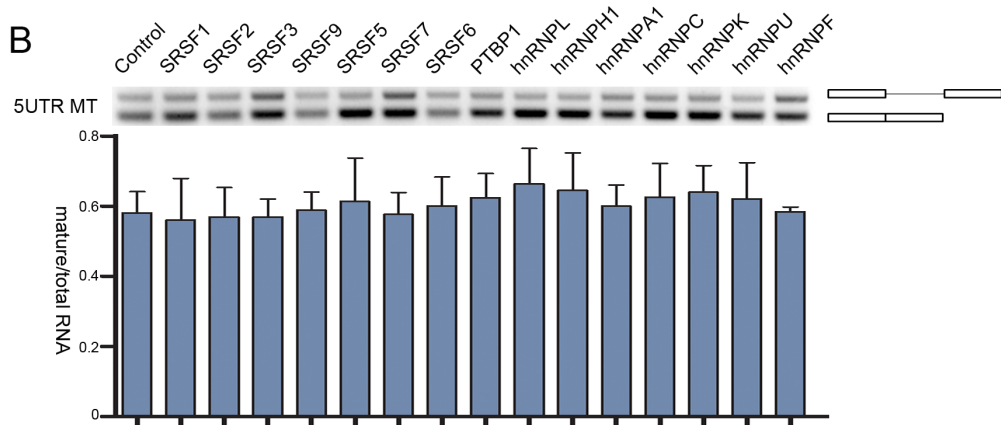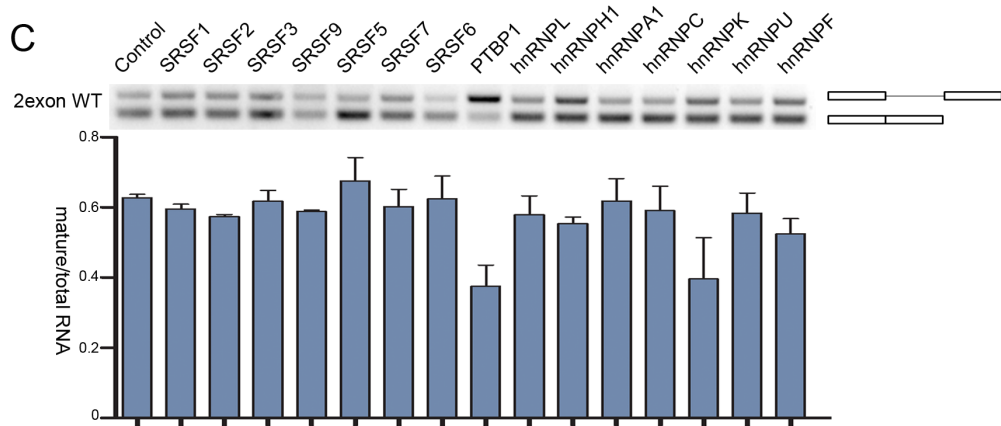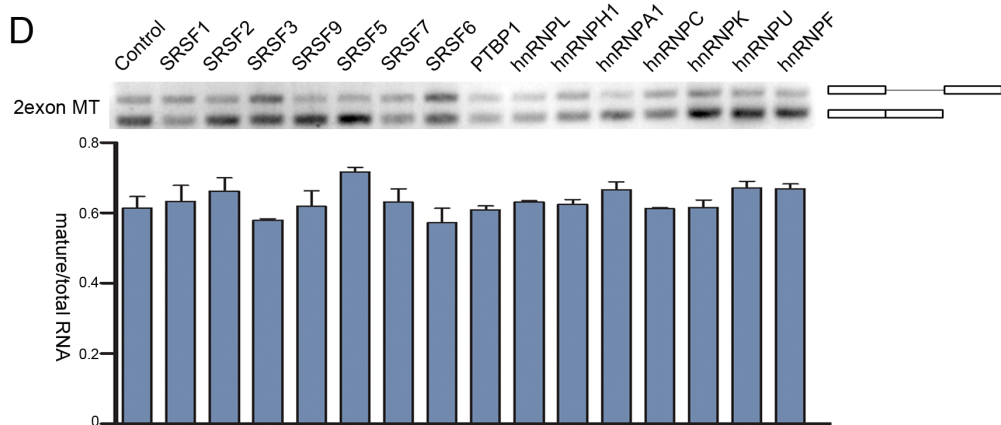

Supplement: NIHMS878227-supplement-Suppl_Figures.pdf [file NIHMS878227-supplement-Suppl_Figures.pdf]
